# Supplementary material for: Cellular senescence contributes to age‐dependent changes in circulating extracellular vesicle cargo and function
Source: PubMed Central journal article supplement (PMC7059145; doi:10.1111/acel.13103), 2020-01-21

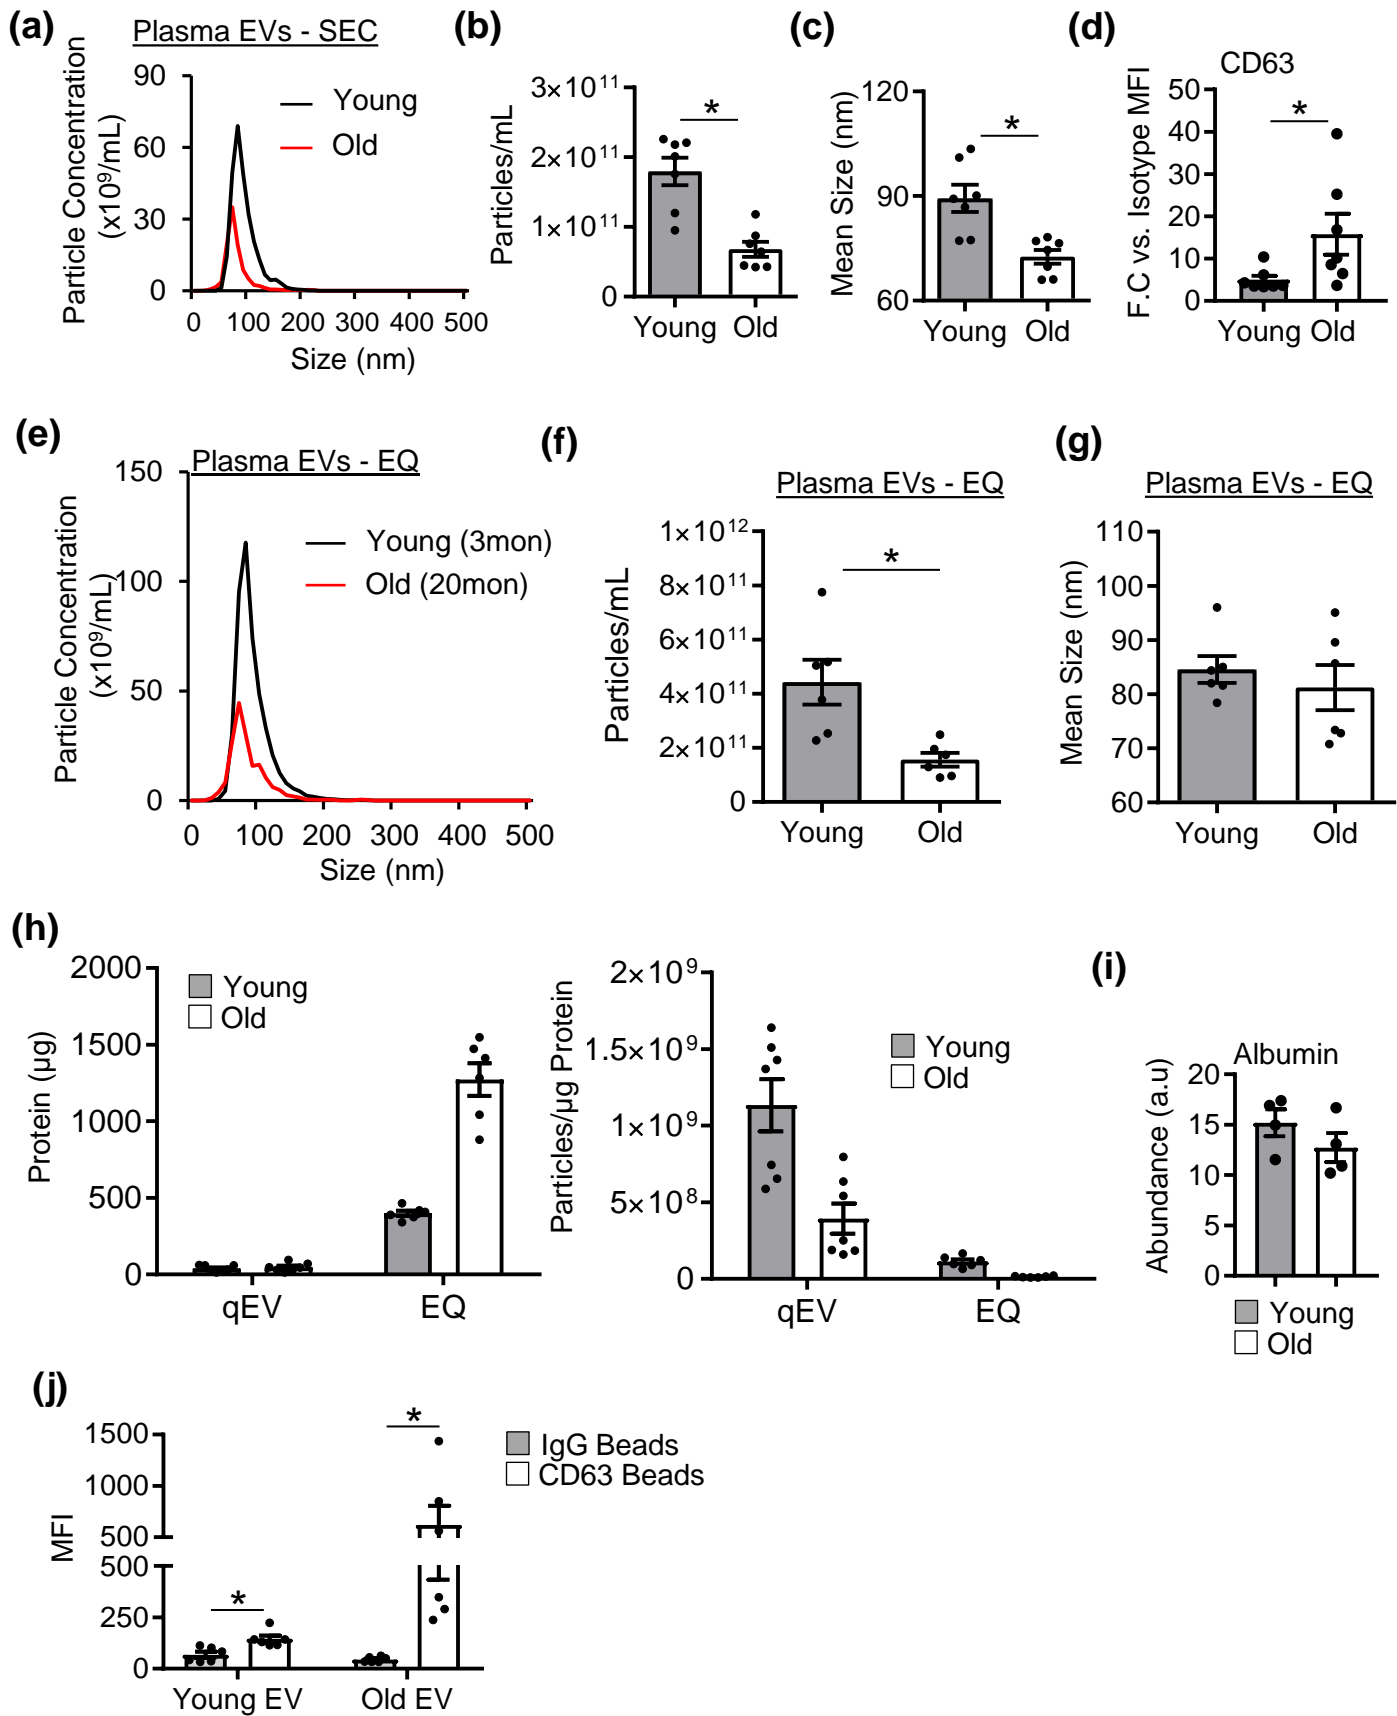

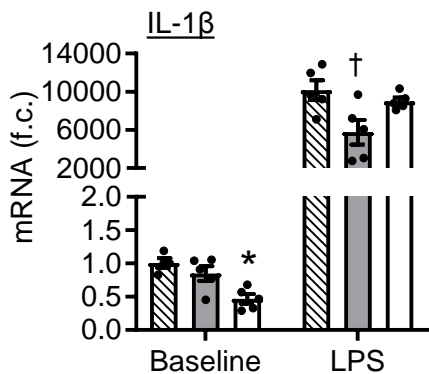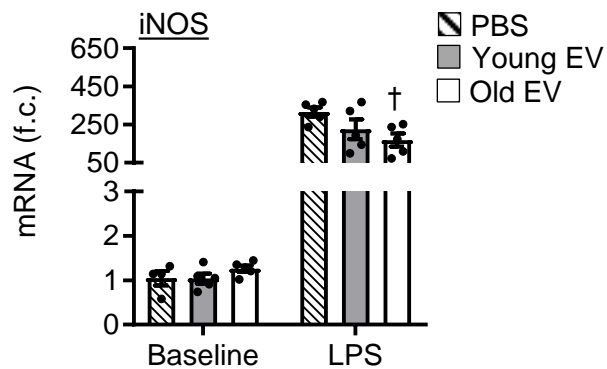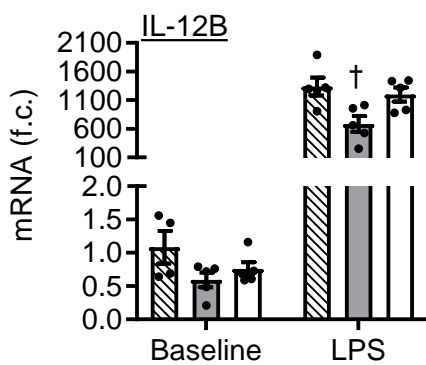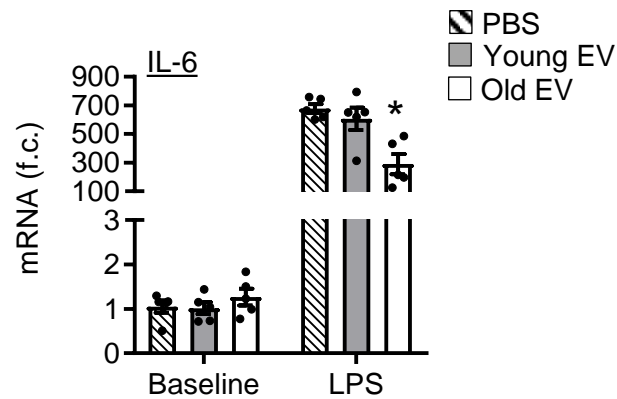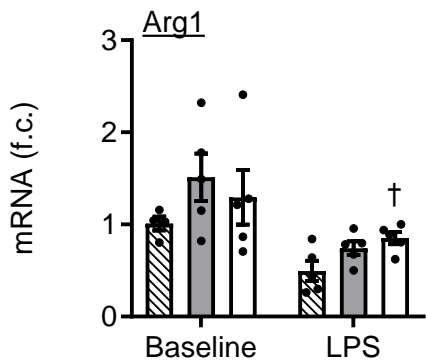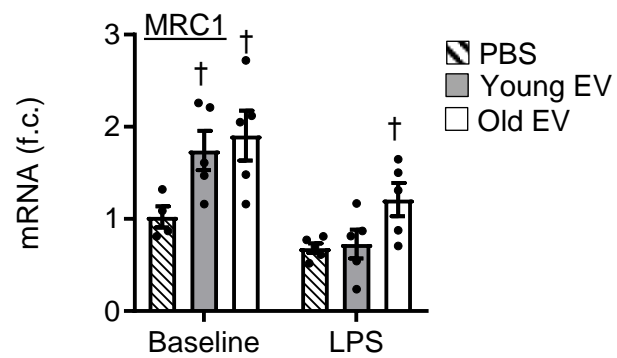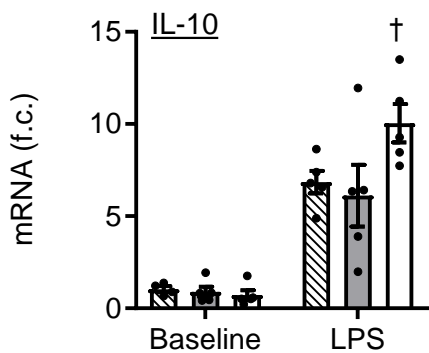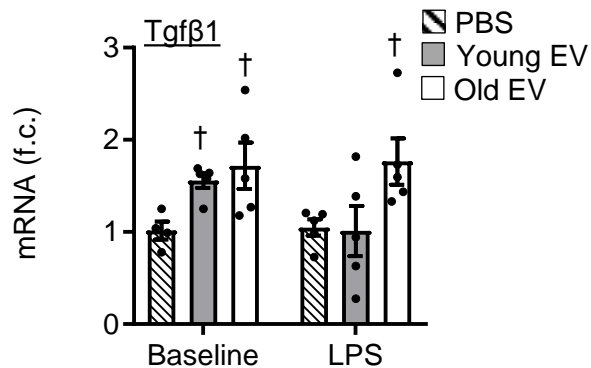

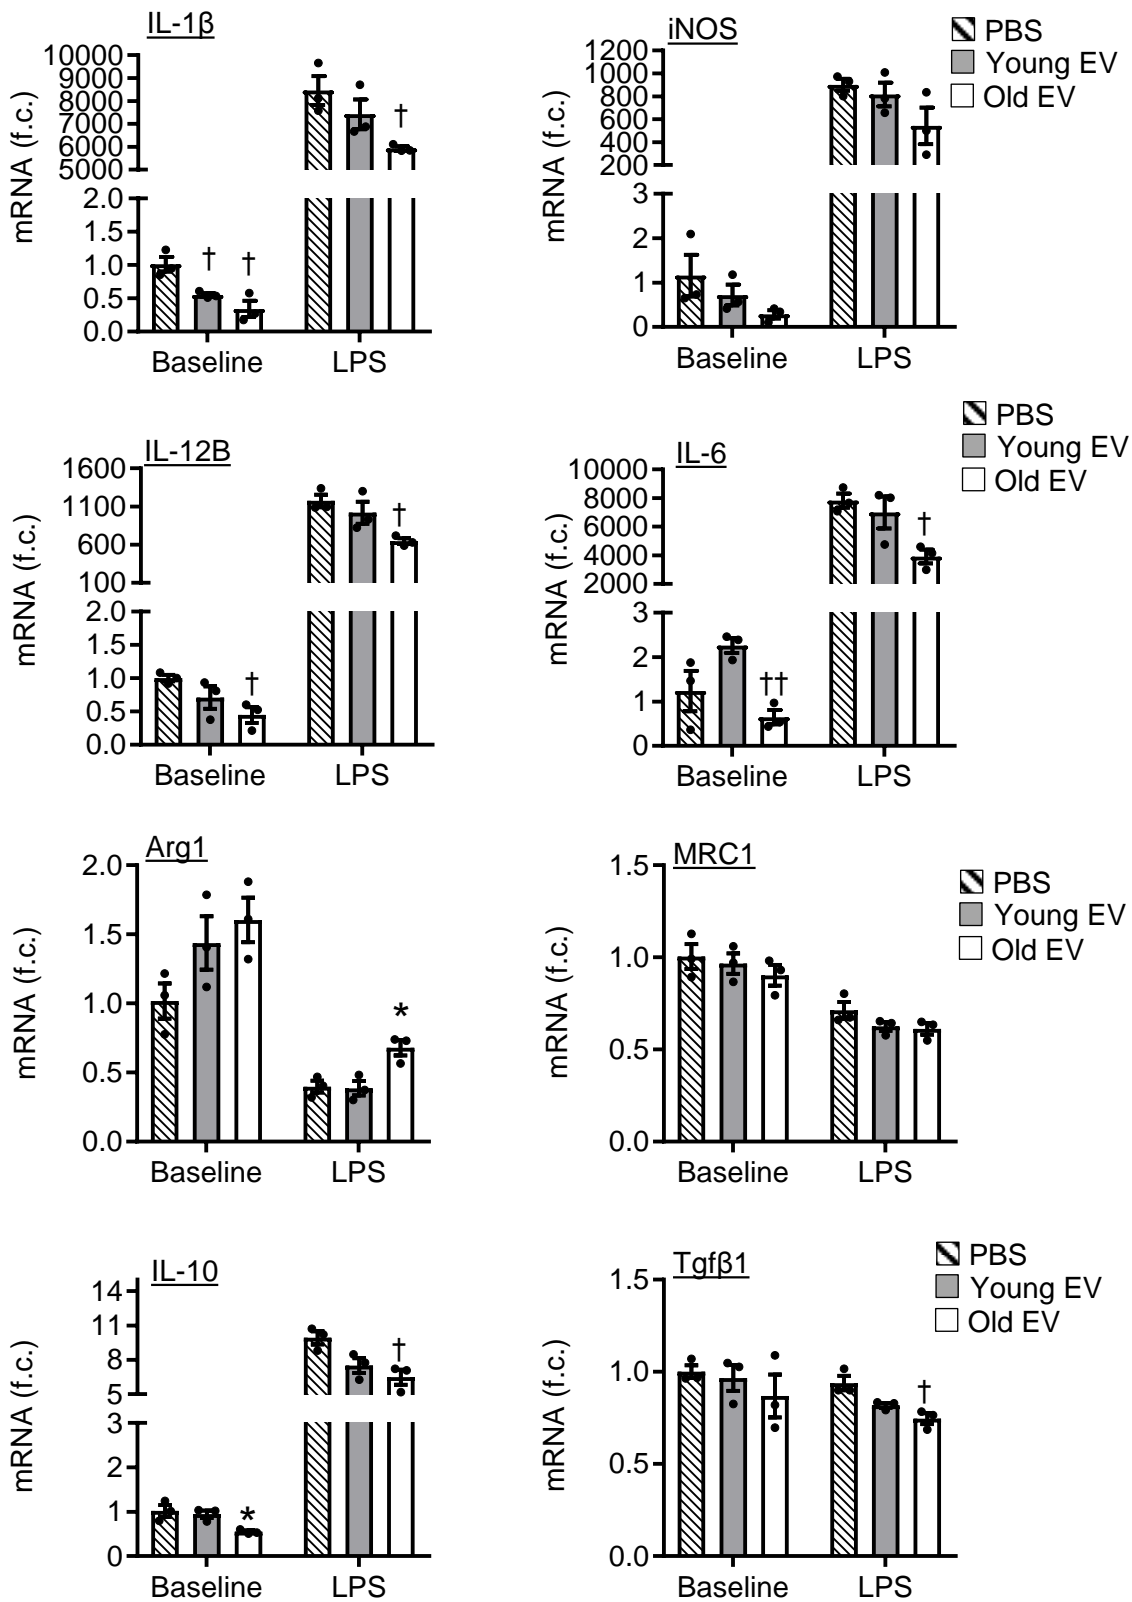

**(a)** Gating Strategy for Peritoneal Macrophage Uptake

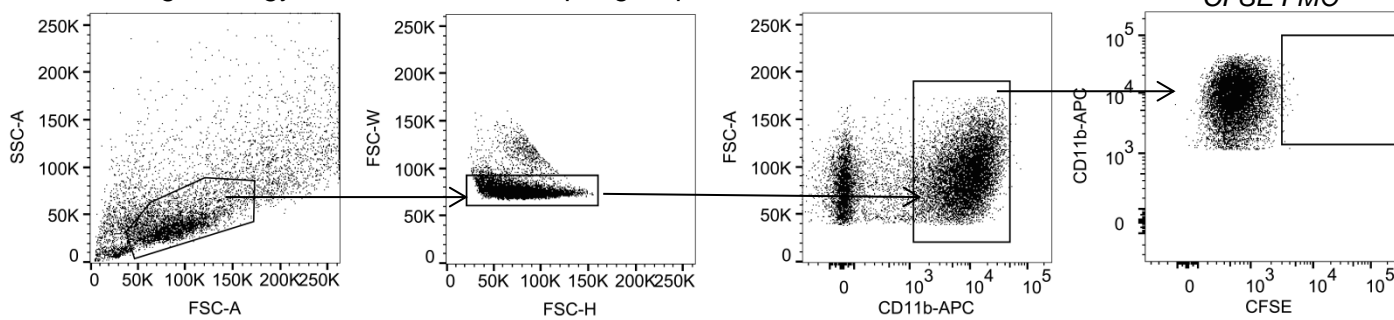

Old Macrophages

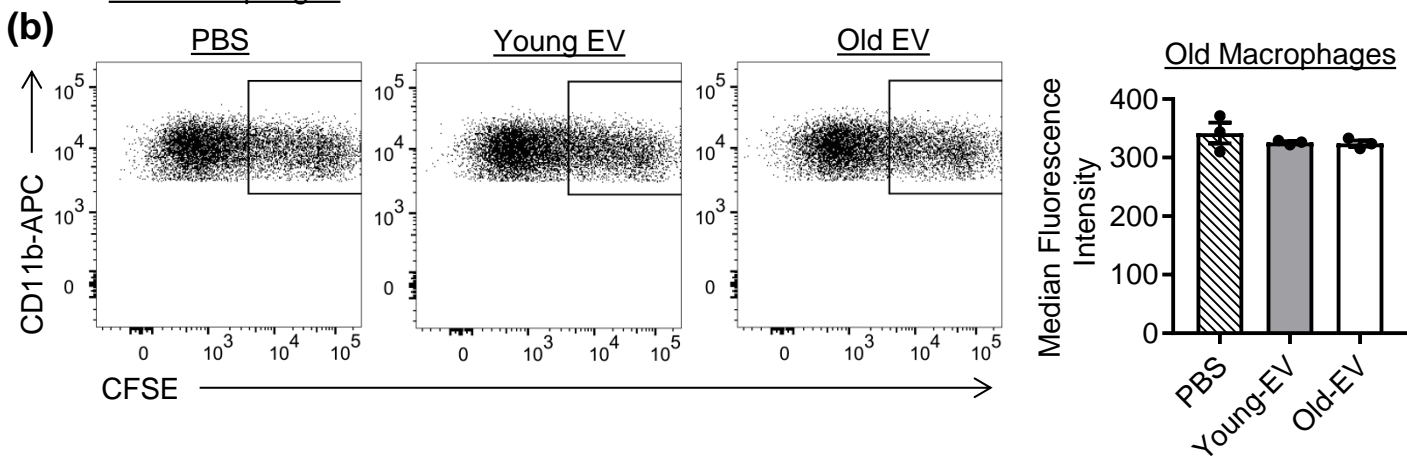

**(c)**

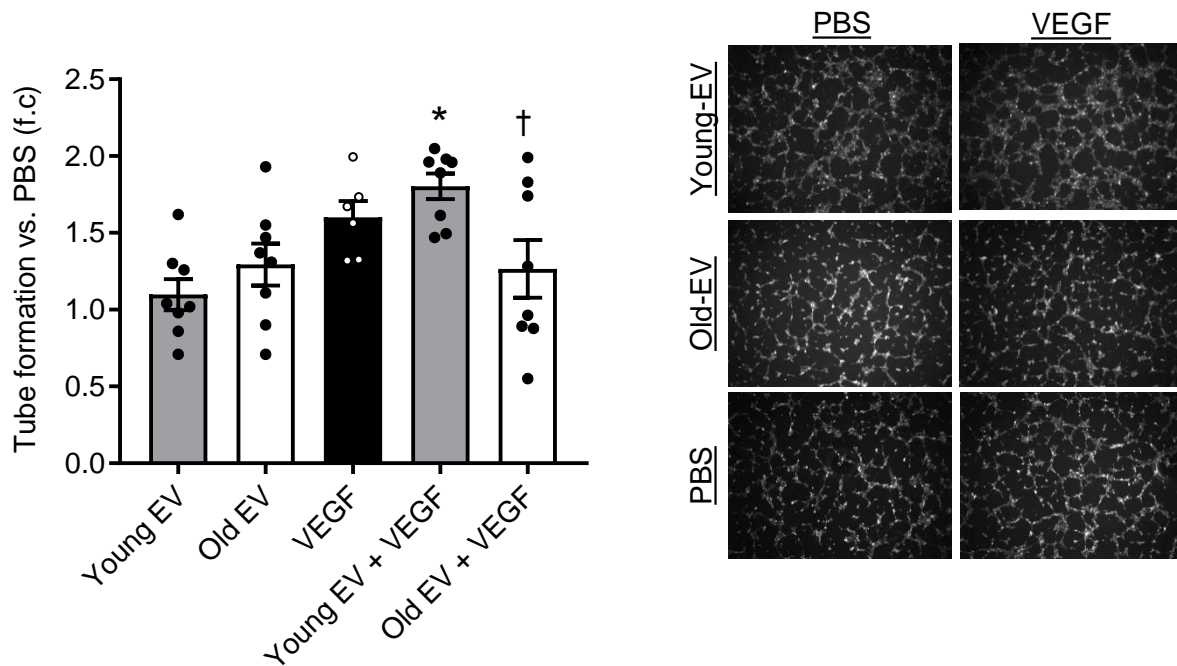

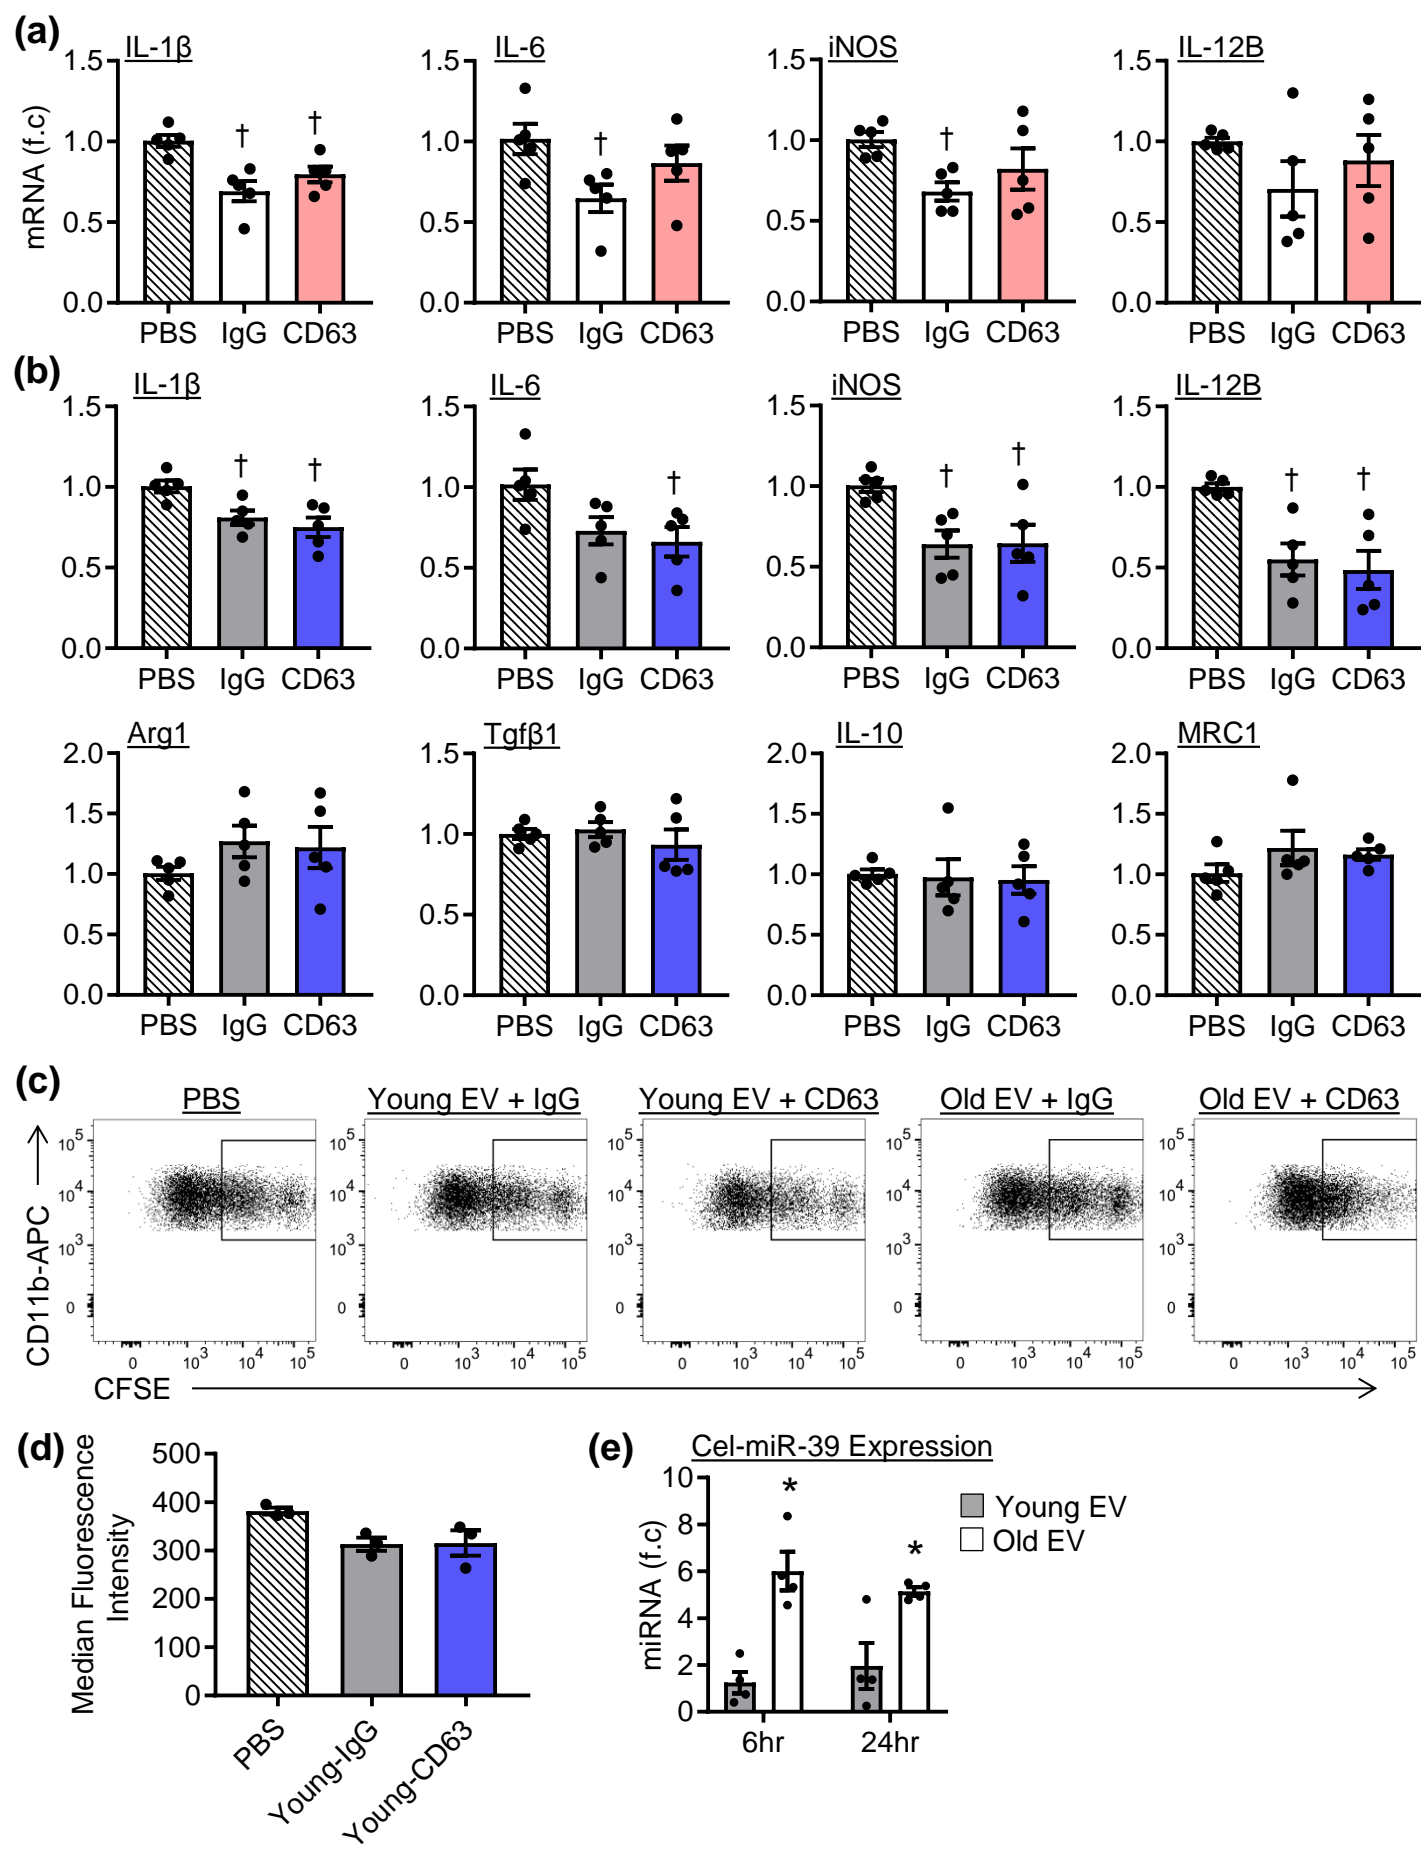

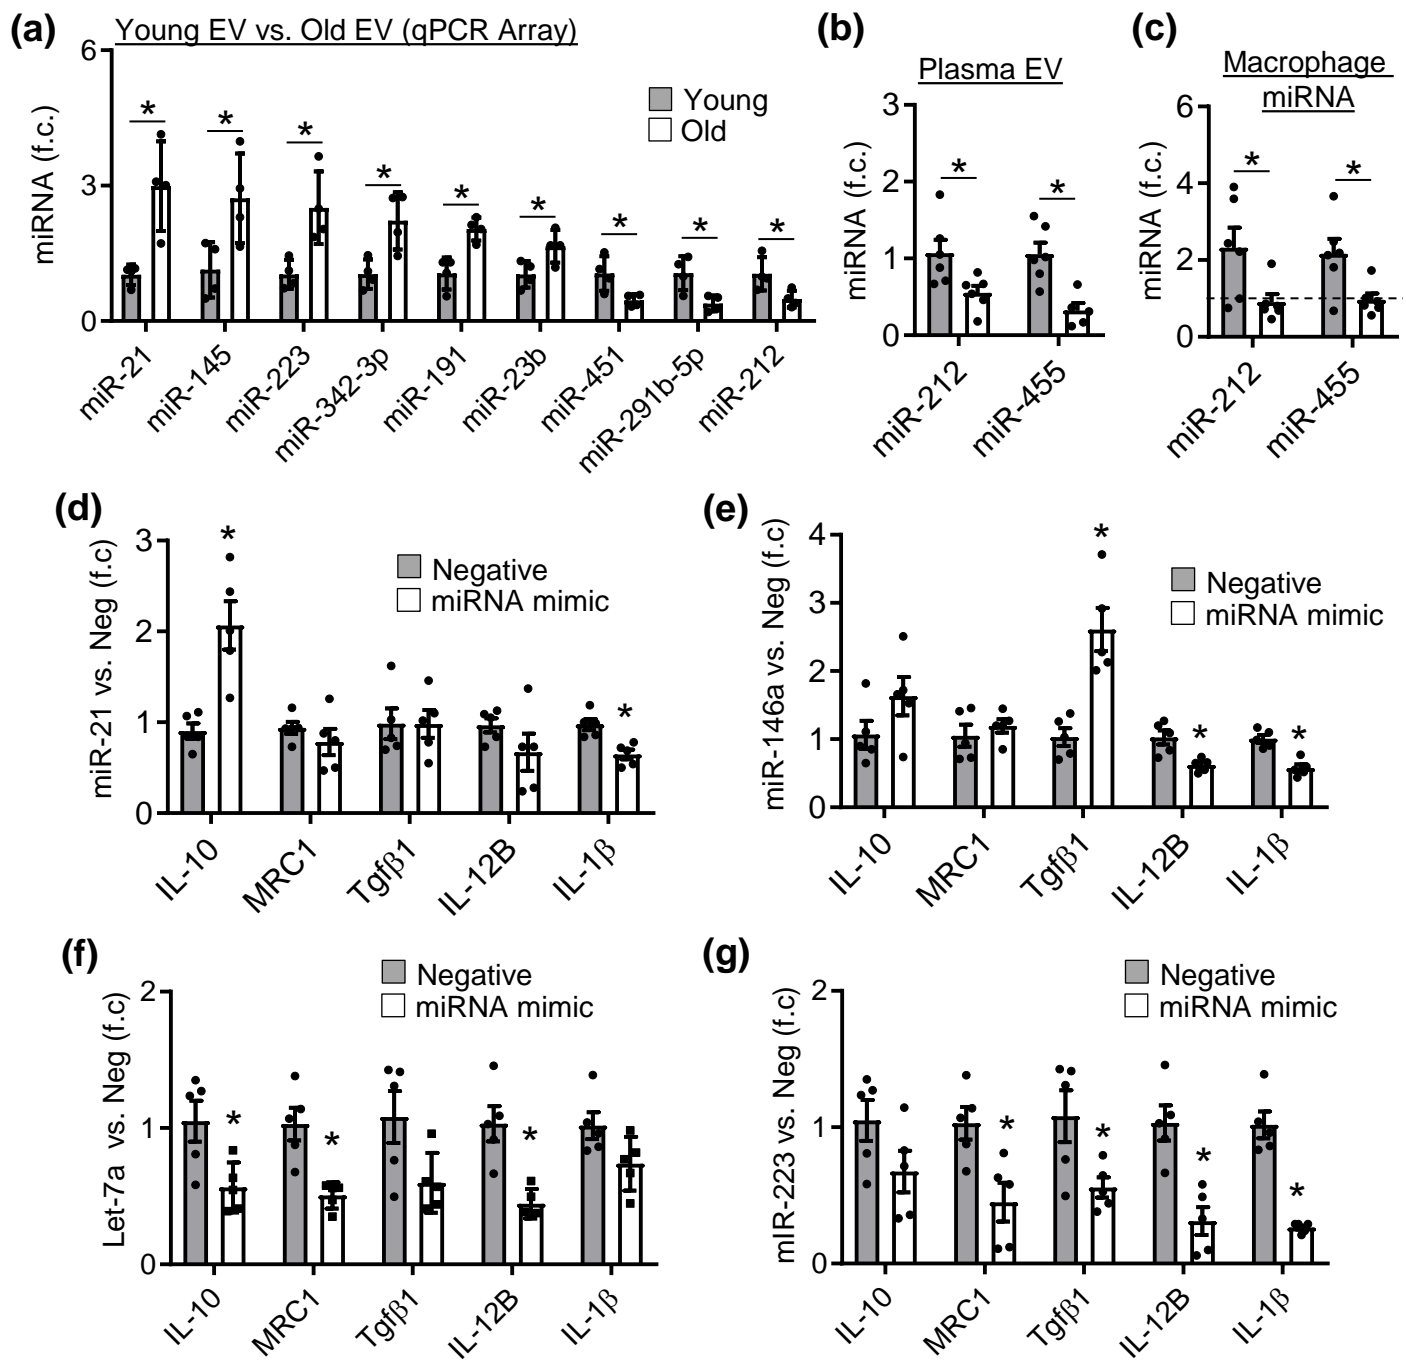

**(a)** Gating Strategy for CD45+/GFP+ Cells

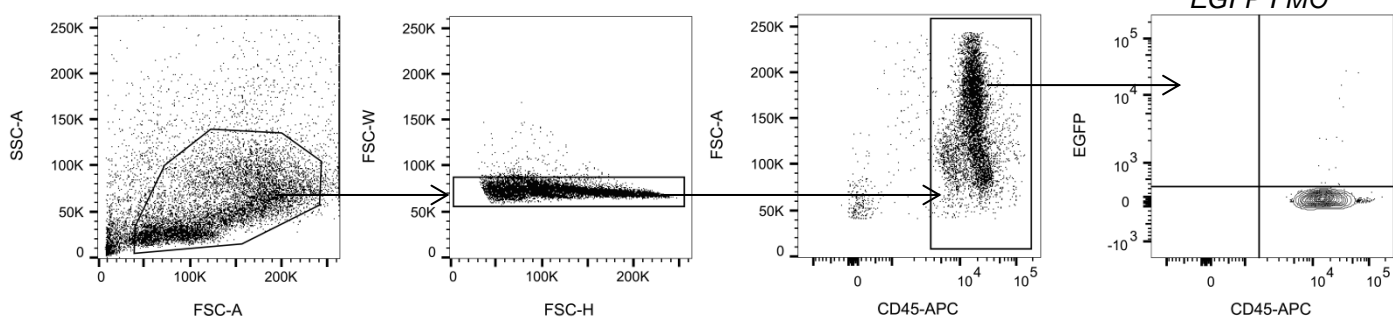

**(b)**

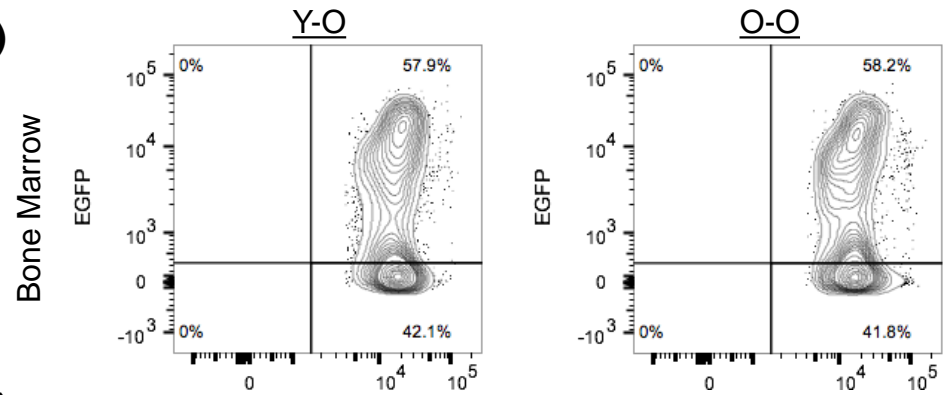

**(c)**

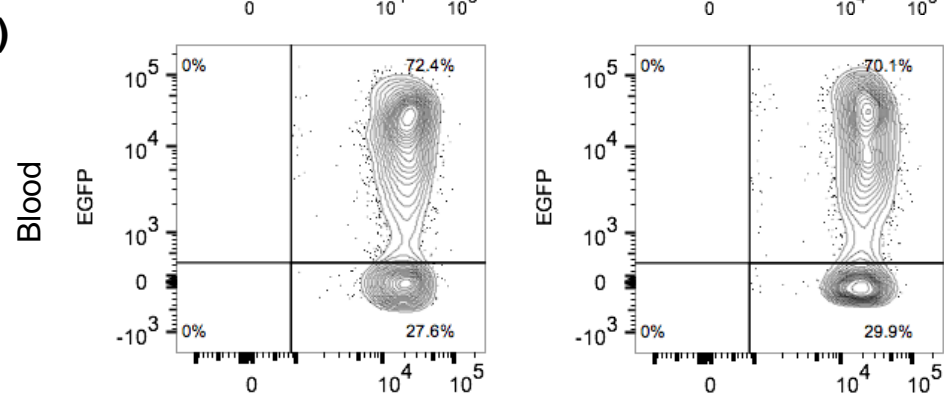

**(d)**

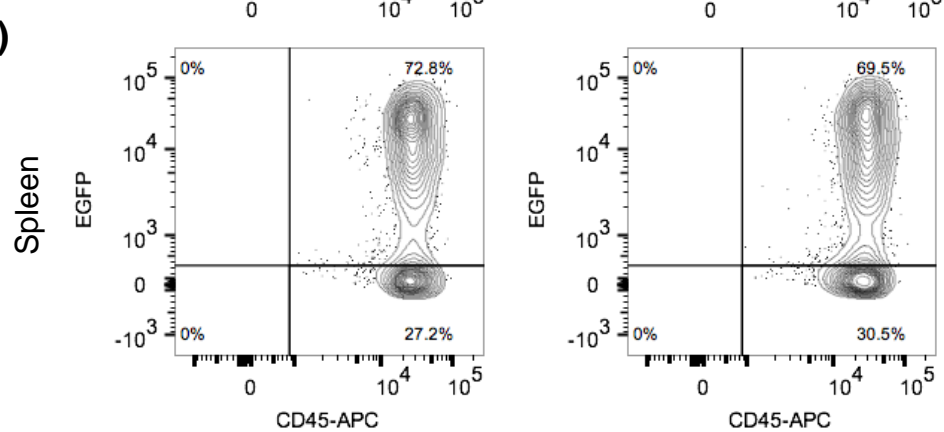

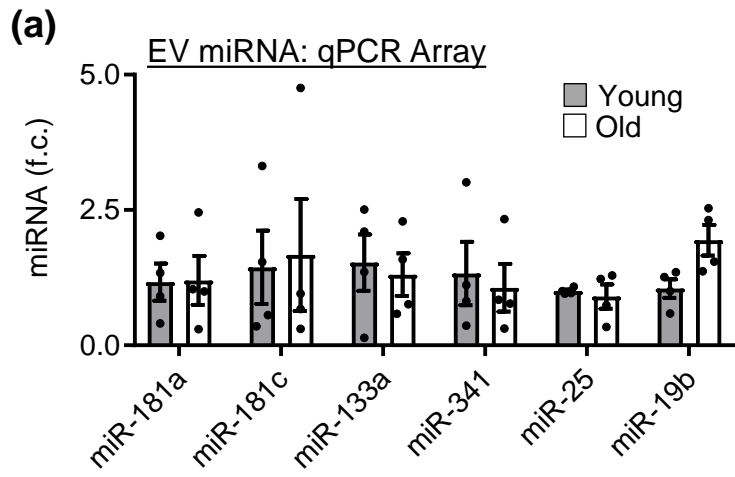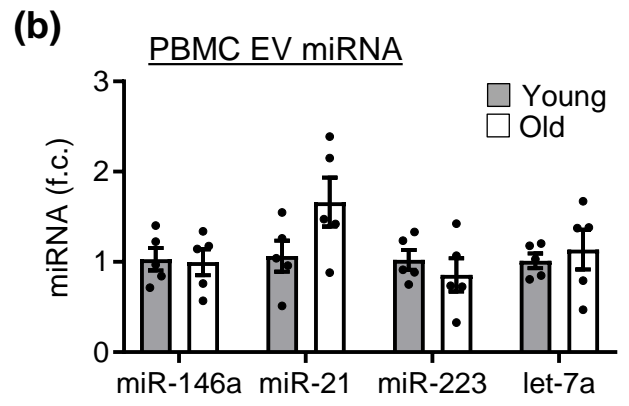



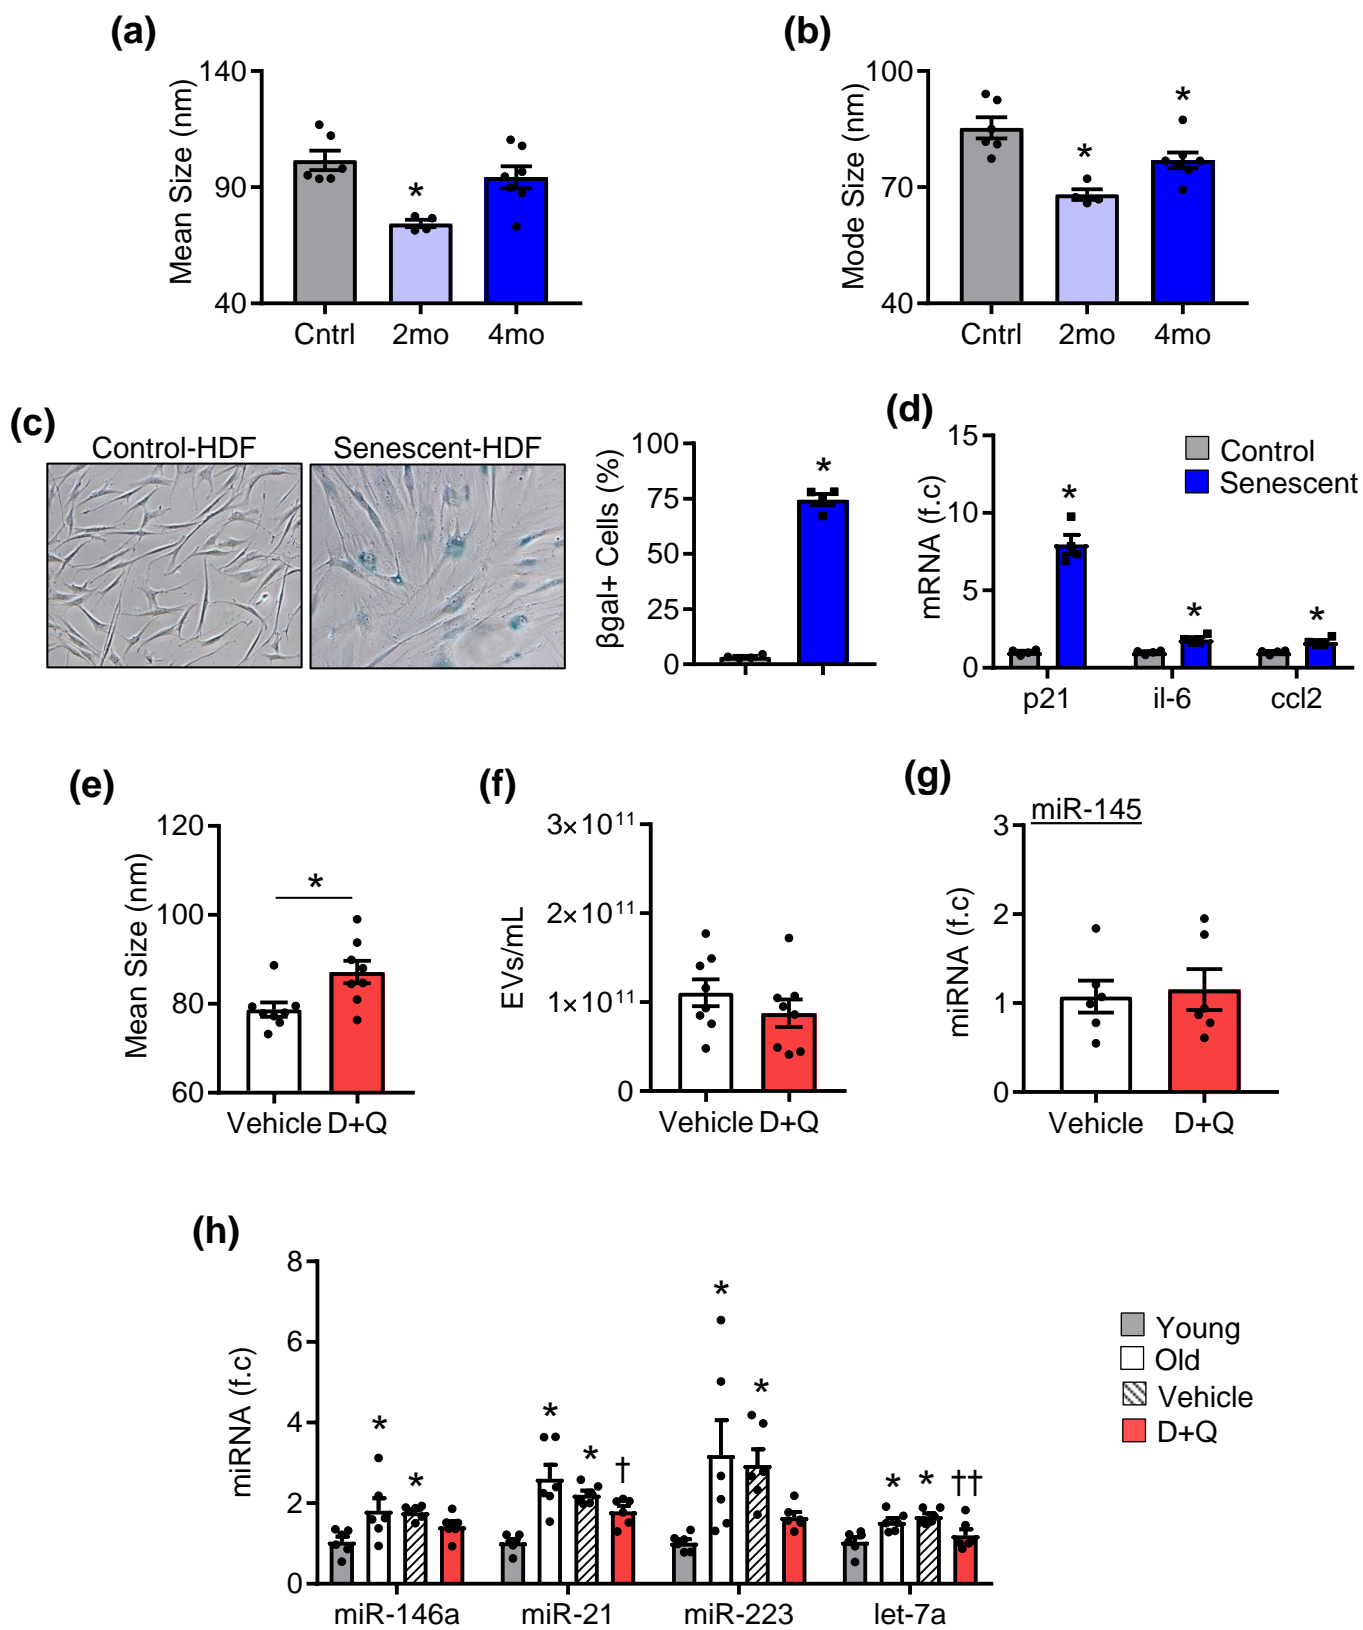

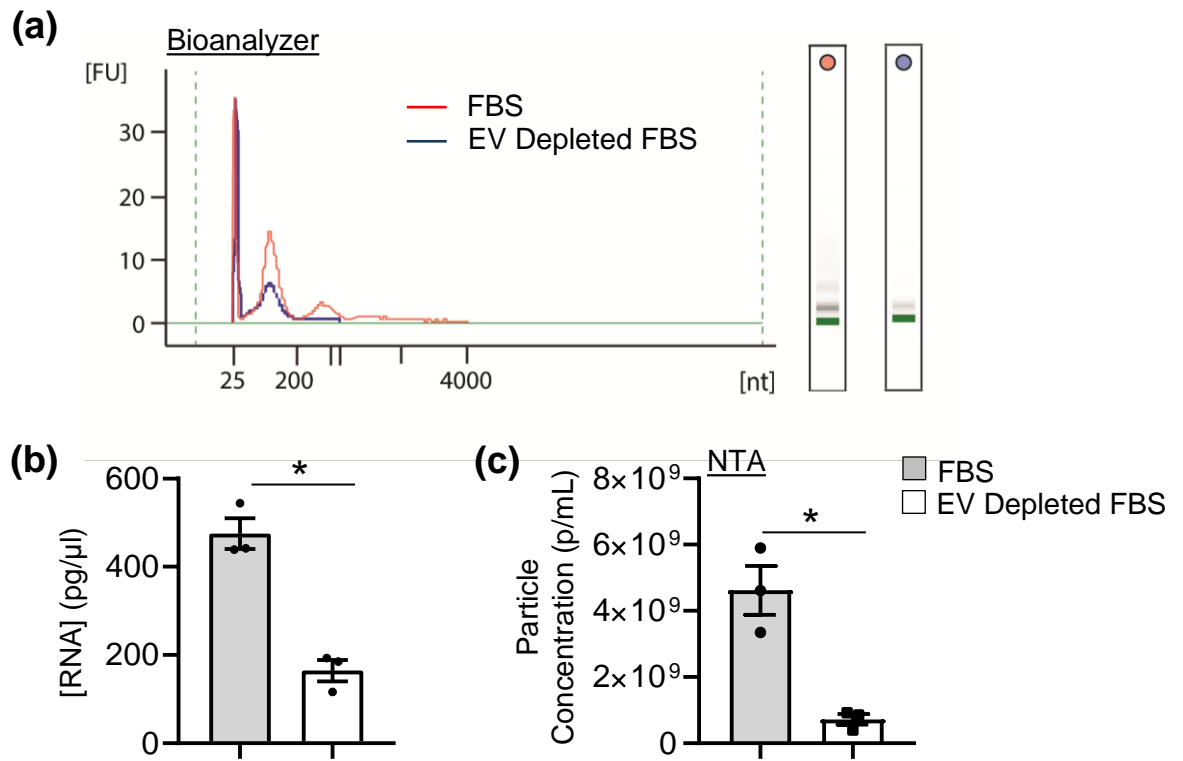

Supplement: ACEL-19-e13103-s001.pdf [file ACEL-19-e13103-s001.pdf]
